# Supplementary material
Source: HighWire-hosted journal article supplement (https://gh.bmj.com/content/6/6/e003649)
Supplement: inline-supplementary-material-5 [file inline-supplementary-material-5.pdf]

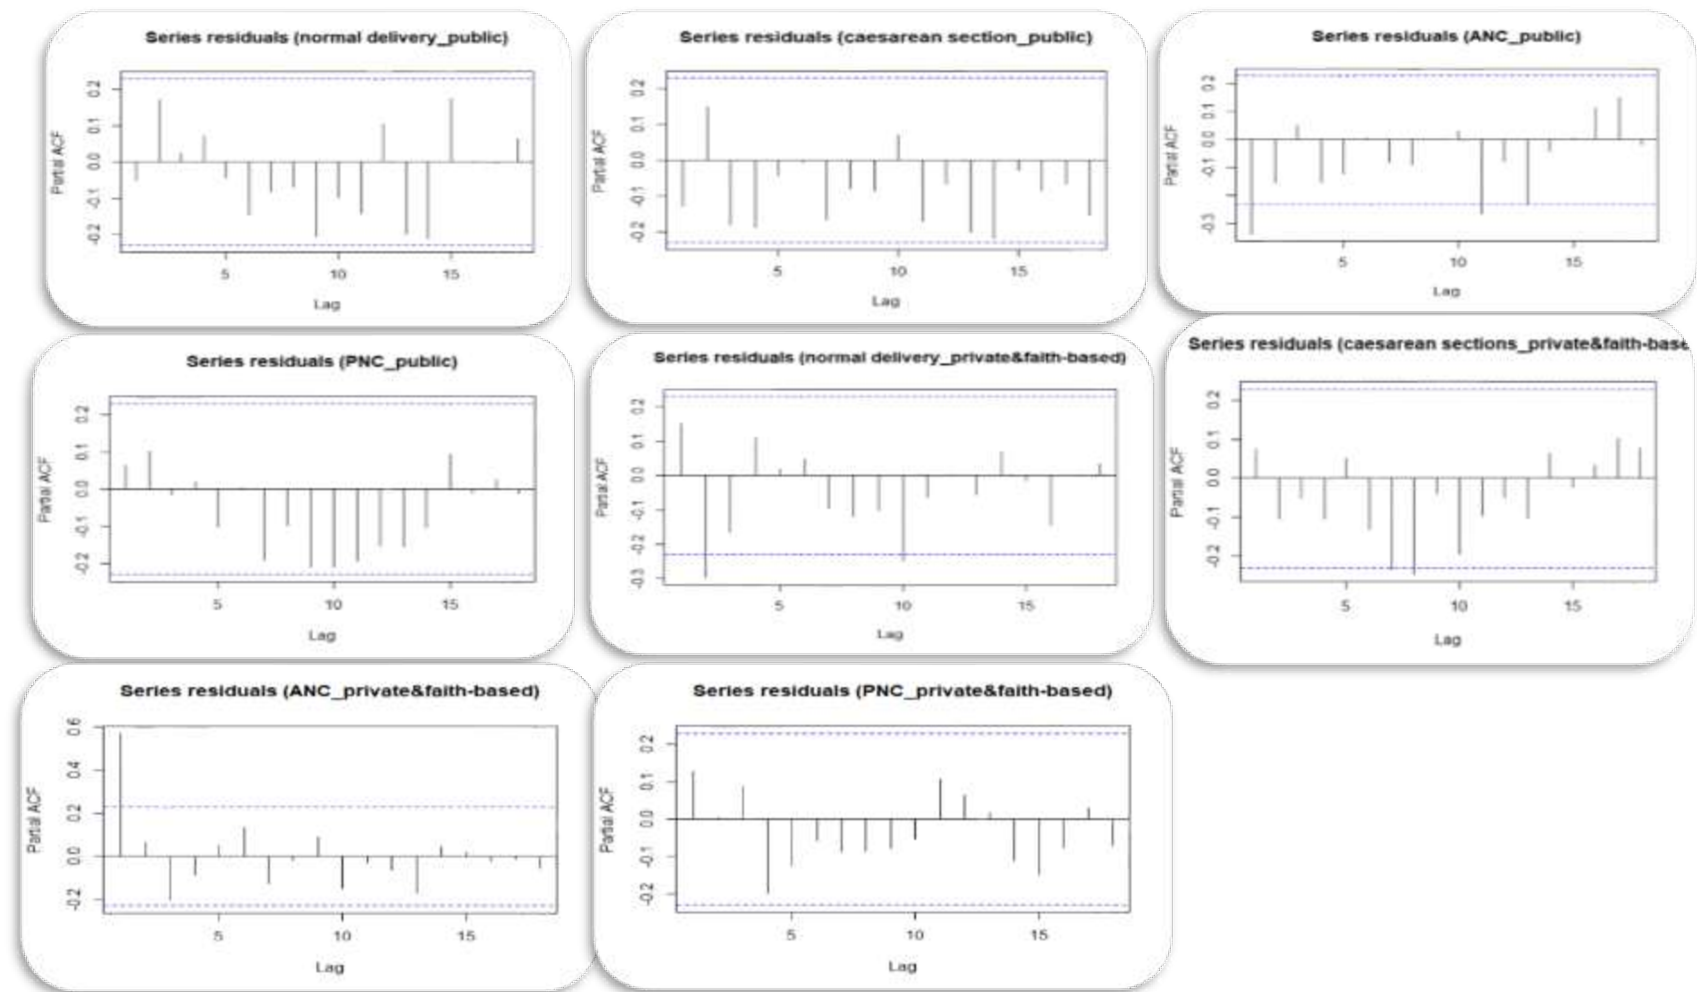

Supplementary Figure 2: Partial autocorrelation function (PACF) plots for the ITS in public, private and faith-based facilities
